# Supplementary material for: ZnO Nanostructures with Antibacterial Properties Prepared by a Green Electrochemical-Thermal Approach
Source: PubMed Central journal article supplement (PMC7153254; doi:10.3390/nano10030473), 2020-03-05
Supplement: nanomaterials-10-00473-s001.pdf [file nanomaterials-10-00473-s001.pdf]

*Electronic supplementary material*

## **ZnO nanostructures with antibacterial properties prepared by a green electrochemical-thermal approach**

**Maria Chiara Sportelli<sup>1, 2</sup>, Rosaria Anna Picca<sup>1, 2\*</sup>, Margherita Izzi<sup>1</sup>, Gerardo Palazzo<sup>1, 2</sup>, Roberto Gristina<sup>3</sup>, Massimo Innocenti<sup>4</sup>, Luisa Torsi<sup>1, 2</sup>, and Nicola Cioffi<sup>1, 2</sup>**

<sup>1</sup> Chemistry Department, University of Bari "Aldo Moro", via E. Orabona 4 – 70126 Bari, Italy. [maria.sportelli@uniba.it](mailto:maria.sportelli@uniba.it); [rosaria.picca@uniba.it](mailto:rosaria.picca@uniba.it); [margherita.izzi@uniba.it](mailto:margherita.izzi@uniba.it); [gerardo.palazzo@uniba.it](mailto:gerardo.palazzo@uniba.it); [luisa.torsi@uniba.it](mailto:luisa.torsi@uniba.it); [nicola.cioffi@uniba.it](mailto:nicola.cioffi@uniba.it).

<sup>2</sup> CSGI (Center for Colloid and Surface Science) c/o Dept. Chemistry, via Orabona 4, 70125 Bari, Italy.

<sup>3</sup> Institute of Nanotechnology, National Research Council of Italy (CNR-NANOTEC), c/o Department of Chemistry, University of Bari "Aldo Moro" via Orabona 4, Bari, 70126, Italy. [roberto.gristina@cnr.it](mailto:roberto.gristina@cnr.it)

<sup>4</sup> Chemistry Department, University of Florence, Via Lastruccia 3-13 – 50019 Sesto Fiorentino (FI), Italy. [m.innocenti@unifi.it](mailto:m.innocenti@unifi.it)

\* Correspondence: [rosaria.picca@uniba.it](mailto:rosaria.picca@uniba.it).

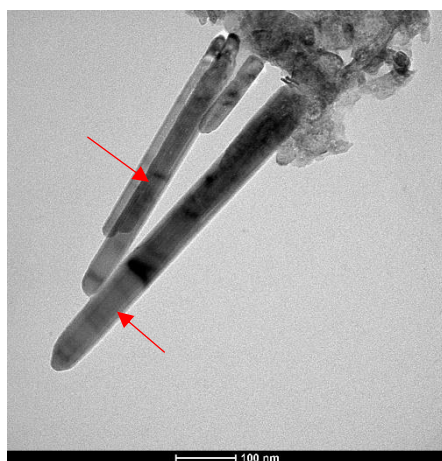

**Figure S1:** TEM micrograph of dried (120 °C) ZnO-PDDA sample. Wires growth lines are highlighted by arrows.

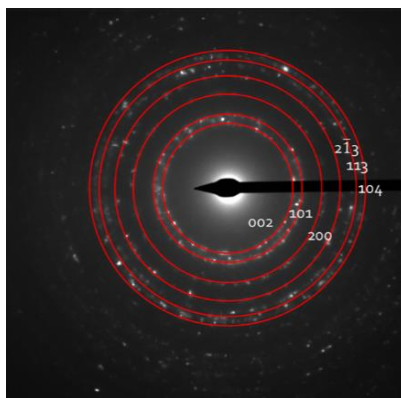

**Figure S2:** Selected area diffraction (SAED) image obtained on ZnO NSs.

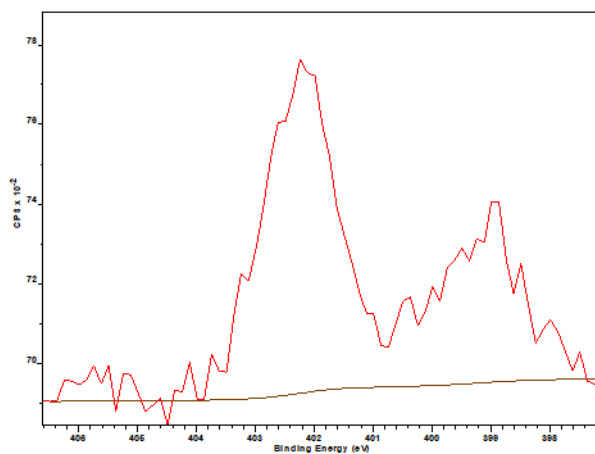

**Figure S3:** N1s XP spectra of dried (120 °C) ZnO-PDDA sample.
